# Supplementary material
Source: PubMed Central journal article supplement (PMC4801136)
Supplement: supp_kwv241_kwv241supp.pdf [file supp_kwv241_kwv241supp.pdf]

## **WEB MATERIAL**

### **Multiple Healthful Dietary Patterns and Type 2 Diabetes in the Women's Health Initiative**

Elizabeth M. Cespedes\*, Frank B. Hu, Lesley Tinker, Bernard Rosner, Susan Redline, Lorena Garcia, Melanie Hingle, Linda Van Horn, Barbara V. Howard, Emily B. Levitan, Wenjun Li, JoAnn E. Manson, Lawrence S. Phillips, Jinnie J. Rhee, Molly E. Waring, and Marian L. Neuhouser

\*Correspondence to Dr. Elizabeth M. Cespedes, Departments of Nutrition and Epidemiology, Harvard T.H. Chan School of Public Health, 665 Huntington Avenue, 3rd Floor, Boston, MA 02115 (e-mail: emc611@mail.harvard.edu).

**Web Table 1.** Scoring Criteria for Diet Quality Indices Using MyPyramid Equivalents in the Women’s Health Initiative OS-CT <sup>a</sup>

|                           | USDA Healthy Eating Index 2010<br>0-100 points<br>12 components, each 5–20 points |   |                                                       |    | Alternate Healthy Eating Index 2010<br>0-110 points<br>11 components, each 10 points |   |                                        |    | Dietary Approaches to Stop Hypertension <sup>b</sup><br>8–40 points<br>8 components, each 5 points |   |                            |   | Alternate Mediterranean Diet Score<br>0–9 points<br>9 components, each 1 point |   |                                                     |   |
|---------------------------|-----------------------------------------------------------------------------------|---|-------------------------------------------------------|----|--------------------------------------------------------------------------------------|---|----------------------------------------|----|----------------------------------------------------------------------------------------------------|---|----------------------------|---|--------------------------------------------------------------------------------|---|-----------------------------------------------------|---|
|                           | Min/Max Criteria and Score                                                        |   |                                                       |    |                                                                                      |   |                                        |    |                                                                                                    |   |                            |   |                                                                                |   |                                                     |   |
| Fruit                     | 0 cups                                                                            | 0 | ≥0.8 cup total fruit; ≥0.4 cup whole fruit/1,000 kcal | 5  | 0 cups                                                                               | 0 | > 2 cups, excl. juices                 | 10 | Low Quintile<br>0.46 cups                                                                          | 1 | High Quintile<br>3 cups    | 5 | < median                                                                       | 0 | > median<br>1.51 cups/day                           | 1 |
| Vegetables                | 0 cups                                                                            | 0 | ≥1.1 cup total; ≥0.2 cup greens/beans                 | 5  | 0 cups                                                                               | 0 | > 2.5 cups                             | 10 | Low Quintile<br>0.44 cups                                                                          | 1 | High Quintile<br>2 cups    | 5 | < median                                                                       | 0 | > median<br>1.05 cups/day                           | 1 |
| Dairy                     | 0 cups                                                                            | 0 | ≥1.3 cup/1,000 kcal, includes high fat                | 10 |                                                                                      | 0 |                                        | 10 | Low Quintile<br>0.09 cups                                                                          | 1 | High Quintile<br>3 cups    | 5 |                                                                                |   |                                                     |   |
| Nuts and legumes          |                                                                                   |   | Allocated to total or plant proteins or vegetables    |    | 0 oz                                                                                 | 0 | > 1oz                                  | 10 | High Quintile<br>0.09 oz                                                                           | 1 | Low Quintile<br>2 oz       | 5 | < median                                                                       | 0 | > median<br>0.25 cups/day legumes, 0.15 oz/day nuts | 1 |
| Fish                      | 0 oz                                                                              | 0 | ≥0.8 oz/1,000 kcal (Seafood/ plant proteins)          |    |                                                                                      |   |                                        |    |                                                                                                    |   |                            |   | < median                                                                       | 0 | > median<br>0.45 oz/day                             | 1 |
| Oils/fats                 |                                                                                   |   | Ratio (PUFA+MUFA): SFA                                |    | >4% Trans; 0 mg EPA+DHA; < 2% PUFA                                                   | 0 | ≤0.5% Trans; 250 mg EPA+DHA; ≥10% PUFA | 10 |                                                                                                    |   |                            |   | < median                                                                       | 0 | > median ratio MUFA:SFA<br>1.14                     | 1 |
| Total protein foods       | 0 oz                                                                              | 0 | > 2.5oz/1,000 kcal                                    | 10 |                                                                                      |   |                                        |    |                                                                                                    |   |                            |   |                                                                                |   |                                                     |   |
| Whole grains              | 0 oz                                                                              | 0 | > 1.5oz/1,000 kcal                                    | 10 | 0 oz                                                                                 | 0 | > 5oz                                  | 10 | Low Quintile<br>0.22 oz                                                                            | 1 | High Quintile<br>3 oz      | 5 | < median                                                                       | 0 | > median<br>1.00 oz/day                             | 1 |
| Refined grains            | ≥4.3 oz                                                                           | 0 | ≤1.8 oz/1,000 kcal                                    | 10 |                                                                                      |   |                                        |    |                                                                                                    |   |                            |   |                                                                                |   |                                                     |   |
| Sugar-sweetened beverages |                                                                                   |   |                                                       |    | >1 serving incl. juice                                                               | 0 | 0 serv                                 | 10 | High Quintile<br>1 serv/day                                                                        | 1 | Low Quintile<br>0 serv/day | 5 |                                                                                |   |                                                     |   |
| Red and processed meats   |                                                                                   |   |                                                       |    | > 2.5oz                                                                              | 0 | 0 oz                                   | 10 | High Quintile<br>0.34 oz                                                                           | 1 | Low Quintile<br>4 oz       | 5 | > median                                                                       | 0 | < median<br>1. oz/day                               | 1 |
| Sodium                    | ≥2.0g                                                                             | 0 | ≤1.1g per 1,000 kcal                                  | 10 | High Decile<br>1177 mg                                                               | 0 | Low Decile<br>4941 mg                  | 10 | High Quintile<br>1382 mg                                                                           | 1 | Low Quintile<br>4314 mg    | 5 |                                                                                |   |                                                     |   |
| Empty calories            | ≥50% kcal                                                                         | 0 | ≤19% kcal from solid fat, added sugars, alcohol       |    |                                                                                      |   |                                        |    |                                                                                                    |   |                            |   |                                                                                |   |                                                     |   |
| Alcohol                   |                                                                                   |   | > 2 drinks/day towards empty kcal                     |    | < 0.5 or >1.5 drinks; non-drinker 2.5 pts                                            | 0 | 0.5-1.5 drinks                         | 10 |                                                                                                    |   |                            |   | <5 or >15g                                                                     | 0 | 5-15g                                               | 1 |

<sup>a</sup> Adapted from George et al. 2014.

<sup>b</sup> Mean values of high and low quintiles are shown.

**Web Table 2.** Participant Characteristics by Category of Standardized Diet Quality Scores (*n* = 101,504), Women’s Health Initiative, 1993–2013

| SD category            | USDA Healthy Eating Index 2010 |                  |                  | Alternate Healthy Eating Index 2010 |                  |                  | Alternate Mediterranean Diet Score |                  |                  | Dietary Approaches to Stop Hypertension |                  |                  |
|------------------------|--------------------------------|------------------|------------------|-------------------------------------|------------------|------------------|------------------------------------|------------------|------------------|-----------------------------------------|------------------|------------------|
|                        | SD < -1                        | SD -1 to 1       | SD > 1           | SD < -1                             | SD -1 to 1       | SD > 1           | SD < -1                            | SD -1 to 1       | SD > 1           | SD < -1                                 | SD -1 to 1       | SD > 1           |
| Overall <i>N</i>       | <i>N</i> =16,617               | <i>N</i> =68,716 | <i>N</i> =16,171 | <i>N</i> =16,824                    | <i>N</i> =67,872 | <i>N</i> =16,808 | <i>N</i> =18,912                   | <i>N</i> =71,680 | <i>N</i> =10,912 | <i>N</i> =18,376                        | <i>N</i> =65,216 | <i>N</i> =17,912 |
| Median score (min-max) | 50 (18-55)                     | 68 (55-77)       | 80 (77-95)       | 35 (13-39)                          | 50 (39-61)       | 66 (61-94)       | 2 (0-2)                            | 4 (3-6)          | 7 (7-9)          | 17 (8-19)                               | 24 (20-28)       | 30 (29-38)       |
|                        | Mean (SD) or %                 |                  |                  |                                     |                  |                  |                                    |                  |                  |                                         |                  |                  |
| Age, years             | 62 (7)                         | 64 (7)           | 65 (7)           | 63 (7)                              | 64 (7)           | 64 (7)           | 63 (7)                             | 64 (7)           | 64 (7)           | 62 (7)                                  | 64 (7)           | 64 (7)           |
| BMI, kg/m <sup>2</sup> | 29 (7)                         | 27 (6)           | 26 (5)           | 29 (6)                              | 27 (6)           | 26 (5)           | 28 (6)                             | 27 (6)           | 26 (5)           | 29 (6)                                  | 27 (6)           | 26 (5)           |
| METs/week              | 8 (12)                         | 14 (14)          | 18 (15)          | 8 (11)                              | 13 (14)          | 20 (16)          | 9 (12)                             | 14 (14)          | 19 (16)          | 8 (11)                                  | 14 (14)          | 20 (16)          |
| Total energy, kcal     | 1818 (766)                     | 1550 (567)       | 1427 (455)       | 1718 (627)                          | 1552 (603)       | 1520 (537)       | 1350 (534)                         | 1596 (603)       | 1826 (561)       | 1596 (638)                              | 1551 (607)       | 1637 (529)       |
| Alcohol, beverage/week | 0.38 (1.08)                    | 0.44 (0.81)      | 0.41 (0.65)      | 0.32 (0.99)                         | 0.43 (0.84)      | 0.52 (0.63)      | 0.36 (0.9)                         | 0.43 (0.84)      | 0.49 (0.68)      | 0.38 (0.88)                             | 0.45 (0.85)      | 0.38 (0.71)      |
| Neighborhood SES       | 74 (9)                         | 76 (8)           | 77 (8)           | 74 (9)                              | 76 (8)           | 78 (8)           | 75 (9)                             | 76 (8)           | 78 (7)           | 73 (10)                                 | 76 (8)           | 78 (7)           |
| Hormone therapy        |                                |                  |                  |                                     |                  |                  |                                    |                  |                  |                                         |                  |                  |
| Current                | 34                             | 43               | 46               | 34                                  | 42               | 48               | 36                                 | 42               | 47               | 34                                      | 43               | 46               |
| Past                   | 26                             | 23               | 23               | 26                                  | 24               | 22               | 25                                 | 23               | 22               | 26                                      | 23               | 22               |
| Never                  | 38                             | 34               | 31               | 38                                  | 34               | 30               | 37                                 | 35               | 31               | 38                                      | 34               | 32               |
| Smoking status         |                                |                  |                  |                                     |                  |                  |                                    |                  |                  |                                         |                  |                  |
| Current                | 15                             | 6                | 3                | 12                                  | 6                | 3                | 12                                 | 6                | 3                | 14                                      | 6                | 2                |
| Past                   | 38                             | 43               | 44               | 35                                  | 42               | 50               | 38                                 | 43               | 46               | 37                                      | 43               | 45               |
| Never                  | 46                             | 50               | 52               | 52                                  | 50               | 45               | 49                                 | 50               | 49               | 47                                      | 50               | 52               |
| Race/ethnicity         |                                |                  |                  |                                     |                  |                  |                                    |                  |                  |                                         |                  |                  |
| Non-Hispanic white     | 78                             | 86               | 89               | 80                                  | 85               | 89               | 83                                 | 85               | 89               | 75                                      | 87               | 91               |
| Black                  | 12                             | 6                | 6                | 12                                  | 6                | 4                | 8                                  | 7                | 5                | 14                                      | 6                | 4                |
| Hispanic/Latina        | 7                              | 3                | 2                | 5                                   | 4                | 2                | 6                                  | 3                | 1                | 7                                       | 3                | 2                |
| Asian                  | 2                              | 3                | 2                | 1                                   | 3                | 3                | 2                                  | 3                | 3                | 3                                       | 3                | 2                |
| Other                  | 2                              | 1                | 1                | 1                                   | 1                | 1                | 1                                  | 1                | 1                | 2                                       | 1                | 1                |
| College graduate       | 27                             | 42               | 52               | 26                                  | 41               | 56               | 28                                 | 42               | 58               | 25                                      | 42               | 56               |
| Family History of T2D  | 33                             | 30               | 27               | 33                                  | 30               | 27               | 31                                 | 30               | 27               | 33                                      | 30               | 27               |

BMI = body mass index; MET = metabolic equivalent of task; SES = socioeconomic status; SD = standard deviation; T2D = type 2 diabetes.

**Web Table 3.** Association of Diabetes per Category and Standard Deviation Higher in Diet Quality in the Women's Health Initiative ( $n = 88,591$ ), After Excluding Women with Prevalent Chronic Disease, 1993–2013

| Index Quintile (Q)<br>(Min-Max Score)   | $n$ (Cases)/ $n$ (Total) | Age-Adjusted<br>Hazard Ratio and<br>95% CI        |      | Multivariable-Adjusted<br>Hazard Ratio and<br>95% CI |      | Multivariable- and<br>BMI-Adjusted<br>Hazard Ratio and<br>95% CI |      |            |
|-----------------------------------------|--------------------------|---------------------------------------------------|------|------------------------------------------------------|------|------------------------------------------------------------------|------|------------|
|                                         |                          | Cases: 9,268; 8.01 Cases/1,000 p-y <sup>a,b</sup> |      |                                                      |      |                                                                  |      |            |
| Alternate Mediterranean Diet Score      |                          | Per SD<br>increase                                | 0.84 | 0.83, 0.86                                           | 0.90 | 0.88, 0.92                                                       | 0.95 | 0.93, 0.97 |
|                                         |                          | Per 10%<br>increase                               | 0.91 | 0.90, 0.92                                           | 0.95 | 0.93, 0.96                                                       | 0.97 | 0.96, 0.98 |
| Q1 (0-2)                                | 1,986 / 16471            | Q1                                                | Ref. |                                                      | Ref. |                                                                  | Ref. |            |
| Q2 (3-3)                                | 1,648 / 15727            | Q2                                                | 0.81 | 0.76, 0.86                                           | 0.86 | 0.80, 0.92                                                       | 0.89 | 0.83, 0.95 |
| Q3 (4-4)                                | 1,905 / 17727            | Q3                                                | 0.80 | 0.75, 0.85                                           | 0.89 | 0.83, 0.95                                                       | 0.94 | 0.88, 1.00 |
| Q4 (5-5)                                | 1,696 / 16478            | Q4                                                | 0.74 | 0.70, 0.79                                           | 0.86 | 0.80, 0.92                                                       | 0.93 | 0.87, 1.00 |
| Q5 (6-9)                                | 2,033 / 22188            | Q5                                                | 0.61 | 0.58, 0.65                                           | 0.74 | 0.69, 0.79                                                       | 0.85 | 0.79, 0.91 |
| USDA Healthy Eating Index 2010          |                          | Per SD<br>increase                                | 0.78 | 0.76, 0.79                                           | 0.89 | 0.87, 0.91                                                       | 0.94 | 0.91, 0.96 |
|                                         |                          | Per 10%<br>increase                               | 0.79 | 0.78, 0.81                                           | 0.90 | 0.88, 0.92                                                       | 0.94 | 0.92, 0.96 |
| Q1 (18 - 57)                            | 2,384 / 17718            | Q1                                                | Ref. |                                                      | Ref. |                                                                  | Ref. |            |
| Q2 (57 - 65)                            | 1,913 / 17718            | Q2                                                | 0.73 | 0.69, 0.77                                           | 0.86 | 0.81, 0.92                                                       | 0.90 | 0.85, 0.96 |
| Q3 (65 - 70)                            | 1,844 / 17719            | Q3                                                | 0.66 | 0.62, 0.70                                           | 0.85 | 0.80, 0.91                                                       | 0.91 | 0.86, 0.97 |
| Q4 (70 - 76)                            | 1,636 / 17718            | Q4                                                | 0.55 | 0.52, 0.59                                           | 0.77 | 0.72, 0.82                                                       | 0.85 | 0.79, 0.91 |
| Q5 (76 - 95)                            | 1,491 / 17718            | Q5                                                | 0.49 | 0.46, 0.52                                           | 0.71 | 0.67, 0.77                                                       | 0.83 | 0.77, 0.89 |
| Alternate Healthy Eating Index 2010     |                          | Per SD<br>increase                                | 0.77 | 0.75, 0.79                                           | 0.87 | 0.85, 0.89                                                       | 0.92 | 0.90, 0.94 |
|                                         |                          | Per 10%<br>increase                               | 0.77 | 0.75, 0.79                                           | 0.87 | 0.85, 0.89                                                       | 0.92 | 0.90, 0.94 |
| Q1 (13 - 41)                            | 2,387 / 17718            | Q1                                                | Ref. |                                                      | Ref. |                                                                  | Ref. |            |
| Q2 (41 - 47)                            | 2,025 / 17718            | Q2                                                | 0.80 | 0.75, 0.85                                           | 0.91 | 0.86, 0.96                                                       | 0.95 | 0.89, 1.01 |
| Q3 (47 - 53)                            | 1,789 / 17719            | Q3                                                | 0.67 | 0.63, 0.71                                           | 0.81 | 0.76, 0.86                                                       | 0.87 | 0.81, 0.92 |
| Q4 (53 - 60)                            | 1,641 / 17718            | Q4                                                | 0.58 | 0.55, 0.62                                           | 0.77 | 0.72, 0.82                                                       | 0.85 | 0.79, 0.90 |
| Q5 (60 - 94)                            | 1,426 / 17718            | Q5                                                | 0.49 | 0.46, 0.52                                           | 0.68 | 0.64, 0.73                                                       | 0.79 | 0.73, 0.84 |
| Dietary Approaches to Stop Hypertension |                          | Per SD<br>increase                                | 0.75 | 0.73, 0.76                                           | 0.86 | 0.84, 0.88                                                       | 0.90 | 0.88, 0.93 |
|                                         |                          | Per 10%<br>increase                               | 0.82 | 0.81, 0.83                                           | 0.90 | 0.89, 0.92                                                       | 0.93 | 0.92, 0.95 |
| Q1 (8 - 19)                             | 2,257 / 16,040           | Q1                                                | Ref. |                                                      | Ref. |                                                                  | Ref. |            |
| Q2 (20 - 22)                            | 1,872 / 17,134           | Q2                                                | 0.70 | 0.66, 0.74                                           | 0.83 | 0.78, 0.88                                                       | 0.86 | 0.81, 0.91 |
| Q3 (23 - 25)                            | 2,168 / 21,099           | Q3                                                | 0.60 | 0.56, 0.63                                           | 0.77 | 0.73, 0.82                                                       | 0.83 | 0.78, 0.88 |
| Q4 (26 - 28)                            | 1,703 / 18,697           | Q4                                                | 0.50 | 0.47, 0.53                                           | 0.69 | 0.65, 0.74                                                       | 0.76 | 0.71, 0.82 |
| Q5 (29 - 38)                            | 1,268 / 15,621           | Q5                                                | 0.43 | 0.40, 0.46                                           | 0.64 | 0.60, 0.68                                                       | 0.74 | 0.69, 0.80 |

<sup>a</sup> Analyses excluded participants with baseline cardiovascular disease or cancer, and adjust for race/ethnicity [non-Hispanic black, Hispanic, other, non-Hispanic white (reference), or missing], age [50-54, 55-59, 60-69, and 70-79 years], and covariates measured at the screening visit, including educational attainment [<General Educational Development/high school, some college or vocational training, college graduate, or post-graduate education (reference)], quintiles of MET-hours/week of recreational physical activity, post-menopausal hormone use (current, former or never [ref reference family history of diabetes (yes/no), smoking status [current, former or never (reference)], study arm [randomization status for Calcium/Vitamin D Trial, Hormone Replacement Therapy, or no assignment (reference)], and dietary energy intake. Additionally adjusted for BMI category where indicated [<18.5, 18.5–24.9, 25.0–29.9, 30.0–34.9, 35.0-39.9, >40 kg/m<sup>2</sup>].

<sup>b</sup> All  $P$  trend values were computed using the median of the quintile as a continuous variable;  $P < 0.001$ .

BMI = body mass index; CaD = Calcium and Vitamin D; GED = General Education Development; HRT = hormone replacement therapy; MET = metabolic equivalent of task; SD = standard deviation; USDA = United States Department of Agriculture.
